# Supplementary material for: Genetic Screens in Human Cells Using the CRISPR-Cas9 System
Source: HighWire-hosted journal article supplement (doi:10.1126/science.1246981), 2013-12-12
Supplement: Wang.SM.pdf [file Wang.SM.pdf]

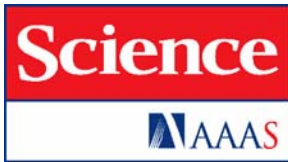

[www.sciencemag.org/content/science.1246981/DC1](http://www.sciencemag.org/content/science.1246981/DC1)

## Supplementary Material for

### Genetic Screens in Human Cells Using the CRISPR/Cas9 System

Tim Wang, Jenny J. Wei, David M. Sabatini,\* Eric S. Lander\*

\*Corresponding author. E-mail: [sabatini@wi.mit.edu](mailto:sabatini@wi.mit.edu) (D.M.S.); [lander@broadinstitute.org](mailto:lander@broadinstitute.org) (E.S.L.)

Published 12 December 2013 on *Science Express*

DOI: 10.1126/science.1246981

**This PDF file includes:**

Materials and Methods

Supplementary Text

Figs. S1 to S5

Tables S5 to S7

Full Reference List

**Other Supplementary Material for this manuscript includes the following:**

(available at [www.sciencemag.org/content/science.1246981/DC1](http://www.sciencemag.org/content/science.1246981/DC1))

Tables S1 to S4 and S8 as separate Excel files

## **Methods and Materials**

### Cell lines and vectors

Materials were obtained from the following sources: HL-60 were kindly provided by Robert Weinberg (Whitehead Institute, Cambridge, MA, USA); pCW57.1 Dox-inducible lentiviral vector, pX330-U6-Chimeric\_BB-CBh-hSpCas9 vector, pLX304 lentiviral vector, and gRNA\_AAVS1-T2 vector from Addgene.

### Cell culture

Unless otherwise specified, 293T cells were cultured in DMEM (US Biological) and supplemented with 20% Inactivated Fetal Calf Serum (Sigma), 5 mM glutamine, and penicillin/streptomycin. HL60 and KBM7 cells were cultured in IMDM (Life Technologies) and supplemented with 20% IFS, 5 mM glutamine and penicillin/streptomycin.

### Viability assay

Cells were seeded in 96-well tissue culture plates at 4000 cells/well in 200  $\mu$ L of media under various treatment conditions. After 3 days, 35  $\mu$ L of CellTiter-Glo reagent (Promega) was added to each well, mixed for 5 minutes, and the luminescence was read on the SpectraMax M5 Luminometer (Molecular Devices). All experiments were performed in triplicate.

### Dosing of screening agents

To determine the appropriate dose of 6-TG and etoposide for screening in KBM7 and HL60 cells, cells were seeded in 96-well tissue culture plates at 4000 cells/well in 200  $\mu$ L of media and were treated in triplicate with varying concentrations of 6-TG and etoposide. A CellTiter-Glo cell viability assay was performed after 4 days to assess drug toxicity. Concentrations at which the viability of WT KBM7 and HL60 cells fell below 5% were chosen.

### Vector construction

To construct the lentiviral doxycycline-inducible FLAG-Cas9 vector, the FLAG-Cas9 ORF from pX330-U6-Chimeric\_BB-CBh-hSpCas9 was cloned into pCW57.1 between the AgeI and EcoRI sites. To construct the lentiviral sgRNA vector, the U6 promoter, the AAVS1-targeting sequence (GGGGCCACTAGGGACAGGAT), and the chimeric sgRNA scaffold from gRNA\_AAVS1-T2 was cloned into pLX304 between the XhoI and NheI sites. Both plasmids are deposited in Addgene.

### Genome-scale lentiviral sgRNA library design

All SpCas9 Protospacer Adjacent Motif (PAM) sites within 5 bases of a coding exon for all RefSeq transcript models were identified. If the first nucleotide of the protospacer/guide sequence did not begin with a 'G' (as is required for RNA polymerase III-dependent transcription), a 'G' was prepended. The sequences were then filtered for homopolymers spanning greater than 3 nucleotides. To avoid potential off-target cleavage, guide sequences that perfectly matched or had only 1 mismatch within the first 12 bases (the 'non-seed' region) with another genomic region were identified using the

short read aligner Bowtie and excluded (33). This specificity search was not performed for sgRNAs targeting ribosomal proteins. Subsequently, guide sequences that contained XbaI or NdeI sites were removed (although the library was eventually cloned via Gibson assembly) and guide sequences were filtered such that no two sgRNAs overlapped by more than 15 base pairs. After this step, all candidate sgRNAs for ribosomal protein genes were included in our final set. Additional candidate genes for screening were selected based upon their putative biological functions. Genes were excluded if they were not expressed (FPKM<1 in all tissues transcriptionally profiled in the Illumina Human Body Map and ENCODE project) or if 10 sgRNA sequences could not be designed. Finally for all remaining genes, 10 candidate sgRNAs were selected with a preference for sequences that (1) targeted constitutive exons, (2) were positioned closest downstream of the start codon and (3) had between 20% and 80% GC content. Sequences for non-targeting control sgRNAs were randomly generated and a specificity check, as described above, was performed. A second mini-library containing sgRNAs targeting ribosomal protein genes (2741 sgRNAs), *BCR* (228 sgRNAs), *ABL1* (223 sgRNAs) and 600 non-targeting control sgRNAs was designed as described above and used for negative selection screening and Cas9 immunoprecipitation/sgRNA sequencing in KBM7 cells.

#### Design of predicted genome-wide library

All SpCas9 Protospacer Adjacent Motif (PAM) sites within 6 bases of a coding exon for all CCDS transcript models were identified. If the first nucleotide of the protospacer/guide sequence did not begin with a 'G' (as is required for RNA polymerase III-dependent transcription), a 'G' was prepended. Sequences with %GC content between 40 to 80% that did not contain any homopolymers spanning greater than 4 nucleotides were considered. Because off-target matches may be unavoidable in some cases (eg. pseudogenes and duplicated genes), sequences were removed only if they mapped to more than 5 regions in the genome. Additionally for uniquely mapped sgRNAs, we then found the number off-target matches that differ from the guide sequence by only one base pair in the first twelve nucleotides (the 'non-seed' region). Olfactory receptor genes and genes with less than 5 sgRNA sequences fulfilling the criteria outlined above were excluded. For all remaining genes, 5-10 candidate sgRNAs were selected with a preference for sequences ordered by (1) the number of matches elsewhere in the genome (2) the number of 1-bp mismatched guide sequences that map elsewhere in the genome (3) the number of transcript models targeted for a given gene (4) the sgRNA score as predicted by the sgRNA efficacy algorithm and (5) the position along the transcript. Guide sequences were first filtered such that no two sgRNAs overlapped by more than 10 base pairs but this condition was relaxed to allow a 15 base pair overlap if no satisfactory sgRNAs could be found. Sequences for non-targeting control sgRNAs were randomly generated and a specificity check, as described above, was performed.

#### Genome-scale lentiviral sgRNA library construction

Oligonucleotides were synthesized on the CustomArray 12K and 90K arrays (CustomArray Inc.) and amplified as sub-pools in a nested PCR. A third round of PCR was performed to incorporate overhangs compatible for Gibson Assembly (NEB) into the lentiviral sgRNA AAVS1-targeting vector between the XbaI and NdeI sites. Gibson Assembly reaction products were transformed into chemically competent DH5alpha cells.

To preserve the diversity of the library, at least 20-fold coverage of each pool was recovered in each transformation and grown in liquid culture for 16-18 hours. Individual sub-pools of the genome-scale library are deposited in Addgene.

#### Virus production and transduction

Lentivirus was produced by the co-transfection of the lentiviral transfer vector with the Delta-VPR envelope and CMV VSV-G packaging plasmids into 293T cells using XTremeGene 9 transfection reagent (Roche). Media was changed 24 hours after transfection. The virus-containing supernatant was collected 48 and 72 hours after transfection and passed through a 0.45 µm filter to eliminate cells. Target cells in 6-well tissue culture plates were infected in media containing 8 µg/mL of polybrene and spin infection was performed by centrifugation at 2,200 rpm for 1 hour. 24 hours after infection, virus was removed and cells were selected with the appropriate antibiotics.

#### Cas9-KBM7 and Cas9-HL60 generation

Cas9-KBM7 and Cas9-HL60 cells were generated by lentiviral transduction of the dox-inducible FLAG-Cas9 vector. After 3 days of selection with puromycin, the cells were clonally sorted using an Aria II SORP (BD FACS) into 96-well tissue culture plates containing 200 µL of media. The level of FLAG-Cas9 expression in the presence and absence of 1µg/mL doxycycline was analyzed for several clonal populations by western blotting. Subsequently, a single colony with the greatest fold-change in Cas9 expression was selected from both cell lines for further studies.

#### Assessment of CRISPR/Cas9 cleavage efficiency

Cas9-KBM7 cells were infected with a sgRNA construct targeting the AAVS1 locus at low MOI. At 0, 1, 2, 4, and 6 days post infection, cells were harvested for genomic DNA extraction. After amplification of the AAVS1 locus (primers sequences listed below), the SURVEYOR nuclease assay (Transgenomics) and gel quantification was performed as previous described (14). For deep sequencing of the target region, the AAVS1 locus was amplified with primers containing overhangs with adapters compatible with Illumina sequencing. Amplicons were sequenced on a MiSeq (Illumina) with a single-end 50 bp run. The resulting reads were aligned to the target reference sequence using the Smith-Waterman algorithm. Mutations were classified as a deletion, insertion, substitution or complex (a mixture of the previous 3 classes). Complex mutations were excluded in downstream analyses.

PCR primer sequences for Surveyor Assay

Primer 1: CCCCGTTCTCCTGTGGATTC

Primer 2: ATCCTCTCTGGCTCCATCGT

Primer sequences for MiSeq Sequencing Assay

Primer 1:

AATGATACGGCGACCACCGAGATCTACACCCCGTTCTCCTGTGGATTC

Primer 2: CAAGCAGAAGACGGCATAACGAGATCATCCTCTCTGGCTCCATCGT

Illumina sequencing primer:

TCTGGTTCTGGGTACTTTTATCTGTCCCCTCCACCCACAGT

### Analysis of CRISPR/Cas9 specificity

Cas9-KBM7 cells were infected with a sgRNA construct targeting the AAVS1 locus (sgAAVS1). Cells were selected for two weeks with blasticidin and harvested for genomic DNA extraction. Potential off-target cleavage sites were predicted by searching for genomic regions with sequence similarity to sgAAVS1 (no more than 3 mismatches were tolerated). Nested PCR primers were designed around these regions and the AAVS1 target region and used to amplify genomic DNA from sgAAVS1-modified and unmodified wild-type cells. PCR amplicons were sequenced on a MiSeq (Illumina) with a single-end 300 bp run. The resulting reads were filtered for the presence of matching forward and reverse primers and primer-dimer products were removed. Using the Needleman-Wunsch algorithm, amplicon reads were aligned to their respective reference sequences and assessed for the presence of an insertion or deletion.

### Pooled screening

In all screens, 90 million target cells were transduced with viral sub-pools and selected with blasticidin 24 hours after infection for 3 days. For the 6-TG screen, Cas9-KBM7 cells were cultured in media containing 400 nM 6-TG. For screens with etoposide, Cas9-KBM7 and Cas9-HL60 cells were cultured in media containing 130 nM and 200 nM of etoposide, respectively. Cultures of untreated Cas9-KBM7 and Cas9-HL60 cells were also maintained in parallel. All cells were passaged every 3 days, and after 12 days, cells were harvested for genomic DNA extraction. In negative selection screens, 10 million cells were harvested for genomic DNA extraction 24 hours after infection. The remaining cells were maintained for 12 doublings before being harvested for genomic DNA extraction.

### Pooled screening deconvolution and analysis

In both the positive and negative selection screens, sgRNA inserts were PCR amplified in a nested PCR and the resulting libraries were sequenced on a HiSeq 2500 (Illumina) with a single-end 50 bp run. The primer sequences for these reactions are provided below. Sequencing reads were aligned to the sgRNA library, and the abundance of each sgRNA was calculated. For the etoposide screens, the sgRNA abundances between the final treated and untreated populations were compared. To identify genes whose loss conferred resistance to etoposide, the (treated-untreated)  $\log_2$  abundances of all sgRNAs targeting a gene was compared with the non-targeting sgRNAs using a one-sided Kolmogorov-Smirnov (K-S) test. p-values were corrected using the Benjamini-Hochberg method. To perform a sgRNA-level z-score analysis for all positive selection screens, the mean and standard deviation of the differential abundances of the non-targeting sgRNAs between treated versus untreated pools was determined. From these values, a z-score was calculated for all other sgRNAs.

In the negative selection screen, the  $\log_2$  fold change in abundance of each sgRNA between the initial and final populations was computed. The significance of a gene hit was assessed by a two-sided K-S test between the  $\log_2$  fold change of all sgRNAs targeting a gene and the values for all targeting sgRNAs. For ribosomal protein genes for which more sgRNAs were designed, random subsets of 10 sgRNAs were sampled for

significance testing and the p-value assigned to the gene was the median value after 50 random samplings. p-values were corrected using the Benjamini-Hochberg method. Gene-based scores were defined as the median log<sub>2</sub> fold change of all sgRNAs targeting a given gene. For all genes, scores were calculated for both the HL60 and KBM7 screens. The two gene lists were sorted and the combined rank was determined. This metric was used for the Gene Set Enrichment Analysis of the C2 curated genes sets.

Primer sequences for sgRNA quantification

Outer primer 1: AGCGCTAGCTAATGCCAACTT

Outer primer 2: GCCGGCTCGAGTGTACAAAA

Inner primer 1:

AATGATACGGCGACCACCGAGATCTACACCGACTCGGTGCCACTTTT

Inner primer 2:

CAAGCAGAAGACGGCATAACGAGATCnnnnnTTTCTTGGGTAGTTTGCAGTTTT

(nnnnn denotes the sample barcode)

Illumina sequencing primer:

CGGTGCCACTTTTTCAAGTTGATAACGGACTAGCCTTATTTAACTTGCTATTT  
CTAGCTCTAAAAC

Illumina indexing primer:

TTTCAAGTTACGGTAAGCATATGATAGTCCATTTTAAAACATAATTTTAAAAC  
TGCAAACCTACCCAAGAAA

#### Generation of sgRNA modified cell lines

Individual sgRNA constructs targeting CDK6 and TOP2A were cloned, lentivirus was produced, and target HL60 cells were transduced as described above. 24 hours after infection cells were cultured in doxycycline and blasticidin for 1 week before further experimentation.

#### Western blotting

Cells were lysed directly in Laemmli sample buffer, separated on a NuPAGE Novex 8% Tris-Glycine gel, and transferred to a polyvinylidene difluoride membrane (Millipore). Immunoblots were processed according to standard procedures, using primary antibodies directed to S6K1 (CST), CDK6 (CST), FLAG (Sigma), and TOP2A (Topogen) and analyzed using enhanced chemiluminescence with HRP-conjugated anti-mouse and anti-rabbit secondary antibodies (Santa Cruz Biotechnology).

#### FLAG-Cas9 immunoprecipitation and sgRNA-sequencing

10 million Cas9-KBM7 cells were transduced with lentivirus from the sgRNA mini-pool as described above. 24 hours after transduction, cells were rinsed once with ice-cold PBS and lysed in RIPA buffer (0.1% SDS, 1% sodium deoxycholate, 1% NP-40, 25 mM Tris-HCl pH 7.6, 150 mM NaCl, 1 mM EDTA, one tablet of EDTA-free protease inhibitor (per 25 ml) and 200U Murine RNase Inhibitor (Sigma)). Cell lysate was homogenized using a 28-gauge syringe needle and incubated with rotation at 4°C for 15 minutes. The soluble fractions of cell lysates were isolated by centrifugation at 13,000 rpm in a refrigerated microcentrifuge for 10 min. The FLAG-M2 affinity gel (Sigma-Aldrich) was washed with lysis buffer three times, and 100 µl of a 50% slurry of the affinity gel was

then added to cleared cell lysates and incubated with rotation for 3 hours at 4°C. The beads were washed eight times with lysis buffer. Bound proteins were specifically eluted from the FLAG-M2 affinity gel with a competing FLAG peptide by incubation at room temperature for 10 minutes. The eluate was cleaned using a RNA Clean & Concentrator-5 column (Zymo Research), treated with TURBO DNase at 37°C for 10 minutes, and dephosphorylated with FastAP Thermosensitive Alkaline Phosphatase (Thermo Scientific) at 37°C for 10 minutes. The reaction was stopped by the addition of EDTA at a final concentration of 25 mM and heated at 68°C for 2 minutes after which the reaction was again cleaned using a RNA Clean & Concentrator-5 column. A sgRNA-specific reverse transcription reaction was performed using the primer listed below with SuperScript III (Life Technologies) at 54°C for 1 hour. The remainder of the library preparation protocol was performed as previously described except that a sgRNA-specific reverse primer was used for library amplification (34). In parallel, sgRNA barcode integrations in the DNA were also sequenced as described above. Sequencing reads from both libraries were aligned to the sgRNA library and the ratio of RNA reads to DNA reads for each sgRNA was used as a measure of Cas9 affinity.

Primer sequences for sgRNA-sequencing library preparation

sgRNA-specific reverse transcription primer: CTCGGTGCCACTTTTTCA

sgRNA-specific library amplification primer:

CAAGCAGAAGACGGCATAACGAGATCTTCAAGTTGATAACGGACTAGCC

#### sgRNA efficacy analysis

Log<sub>2</sub> fold change (depletion) values for sgRNAs targeting ribosomal protein genes were used as a proxy for sgRNA efficacy. Depletion values were analyzed with respect to guide sequence GC content, the target exon position and the strand targeted. The predictive power of the features uncovered was examined by using a general linear model. sgRNAs against inessential ribosomal genes (*RPS4Y2*, *RPS4Y1*, *RPL22L1*, *RPL3L*, *RPL10L*, *RPL26L1*, *RPL39L*, *RPS27L*) were omitted from this analysis.

#### sgRNA efficacy prediction

A support-vector-machine classifier was used to predict sgRNA efficacy. The target sequences (each encoded by a vector of 80 binary variables representing the presence or absence of each nucleotide (A, C, T, G) at each position (1-20) along the target sequence) of ribosomal protein gene-targeting sgRNAs were used as inputs to the classifier which was trained on the change in abundance observed (encoded by a binary variable corresponding to ‘weak’ and ‘strong’ sgRNAs using a cutoff based on the bimodality of the distribution). Target sequences of sgRNAs targeting the 400 most essential non-ribosomal genes from the Cas9-KBM7 screens were used to predict efficacy. Class membership was again determined based on the bimodality of the distribution. sgRNAs against inessential ribosomal genes (*RPS4Y2*, *RPS4Y1*, *RPL22L1*, *RPL3L*, *RPL10L*, *RPL26L1*, *RPL39L*, *RPS27L*) were omitted from this analysis.

## Supplementary Text

### Note S1. Examination of potential sgRNA off-target sites.

We determine the expected number of potential off-target sites in the human genome and exome allowing for up to 3 mismatches in the non-seed region (first 12 base pairs) by the following calculation:

$$\begin{aligned}p_{20} &= \left(\frac{1}{4}\right)^{20} = \text{probability of a perfect 20 base pair match} \\p_{PAM} &= \binom{1}{2} \binom{1}{4} = \binom{1}{8} = \text{probability of a PAM sequence match (AG or GG allowed)} \\MM_3 &= \binom{12}{3} (4 - 1)^3 = \# \text{ of 3 base pair mismatch combinations in non-seed region} \\MM_2 &= \binom{12}{2} (4 - 1)^2 = \# \text{ of 2 base pair mismatch combinations in non-seed region} \\MM_1 &= \binom{12}{1} (4 - 1) = \# \text{ of 1 base pair mismatch combinations in non-seed region} \\PM &= 1 = \text{perfect match in non-seed region} \\S_{genome} &= 3 \times 10^9 = \text{size of the human genome} \\S_{exome} &= 5 \times 10^7 = \text{size of the human exome (UTR + CDS)} \\OT_{Genome} &= (p_{20})(p_{PAM})(MM_3 + MM_2 + MM_1 + PM)(S_{genome}) \\&\approx 2.23 \text{ expected off-target sites in the genome per sgRNA} \\OT_{Exome} &= (p_{20})(p_{PAM})(MM_3 + MM_2 + MM_1 + PM)(S_{exome}) \\&\approx 0.0372 \approx \frac{1}{27} \text{ expected off-target sites in the exome per sgRNA}\end{aligned}$$



**Fig. S1**

**A**

| Locus | Sequence                                                   | Genomic Coordinates        | % Indel (mutant/total) |                 |
|-------|------------------------------------------------------------|----------------------------|------------------------|-----------------|
|       |                                                            |                            | sgAAVS1                | WT              |
| AAVS1 | GGGGCCACTAGGGACAGGAT <b>TGG</b>                            | chr19: 55627117-55627139   | 96.9% (7299/7531)      | 0% (0/440)      |
| OT1   | GGGGC <b>TT</b> CTA <b>AGG</b> ACAGGAT <b>GGG</b>          | chr19: 16174987-16175009   | 29.5% (23724/80346)    | 0.07% (6/8088)  |
| OT2   | GGGGC <b>AA</b> CTAG <b>AG</b> ACAGGA <b>AGG</b>           | chr8: 22635581-22635603    | 2.46% (49/1990)        | 0% (0/961)      |
| OT3   | GGGGCC <b>CC</b> T <b>GGG</b> GACAG <b>AA</b> T <b>GGG</b> | chr21: 42892942-42892964   | 1.36% (316/23230)      | 0.07% (2/2800)  |
| OT4   | GGGGCC <b>AG</b> T <b>GGG</b> GACAGGA <b>AGG</b>           | chr2: 232824540-232824562  | 0.68% (179/26249)      | 0.58% (20/3457) |
| OT5   | GG <b>TG</b> CCAC <b>CA</b> GGGA <b>G</b> AGGAT <b>GGG</b> | chr22: 44699098-44699120   | 0.10% (1/1034)         | 0% (0/201)      |
| OT6   | GG <b>TG</b> CCACTAG <b>GC</b> ACAGGA <b>G</b> CGG         | chr8: 144885120-144885142  | 0.08% (2/2623)         | 0% (0/1247)     |
| OT7   | GGGGCCACTAG <b>AGA</b> AGGGAT <b>GGG</b>                   | chr13: 37196607-37196629   | 0.03% (1/3998)         | 0% (0/662)      |
| OT8   | GGGG <b>T</b> CACT <b>GGG</b> GACA <b>AG</b> AT <b>TGG</b> | chr15: 45827893-45827915   | 0.02% (2/11823)        | 0.05% (2/3750)  |
| OT9   | <b>T</b> GGGCCACTAT <b>TG</b> GACAGGA <b>AT</b> T <b>G</b> | chr12: 108581676-108581698 | 0.01% (4/65617)        | 0.01% (1/8704)  |
| OT10  | GGGGCCACTAGGG <b>AA</b> AG <b>AG</b> T <b>GGG</b>          | chr11: 47446589-47446611   | 0% (0/5340)            | 0.08% (1/1279)  |
| OT11  | GGG <b>CC</b> ACTAGGG <b>TCA</b> AGAT <b>AGG</b>           | chr2: 60390559-60390581    | 0% (0/555)             | 0% (0/153)      |
| OT12  | GGGG <b>GA</b> ACTAG <b>TG</b> ACAGGAT <b>AGG</b>          | chr20: 42338563-42338585   | 0% (0/4031)            | 0% (0/2153)     |
| OT13  | GGGGCC <b>AG</b> TAGGG <b>G</b> CAGGA <b>CAGG</b>          | chr20: 31034830-31034852   | 0% (0/249)             | 0% (0/326)      |

**B**

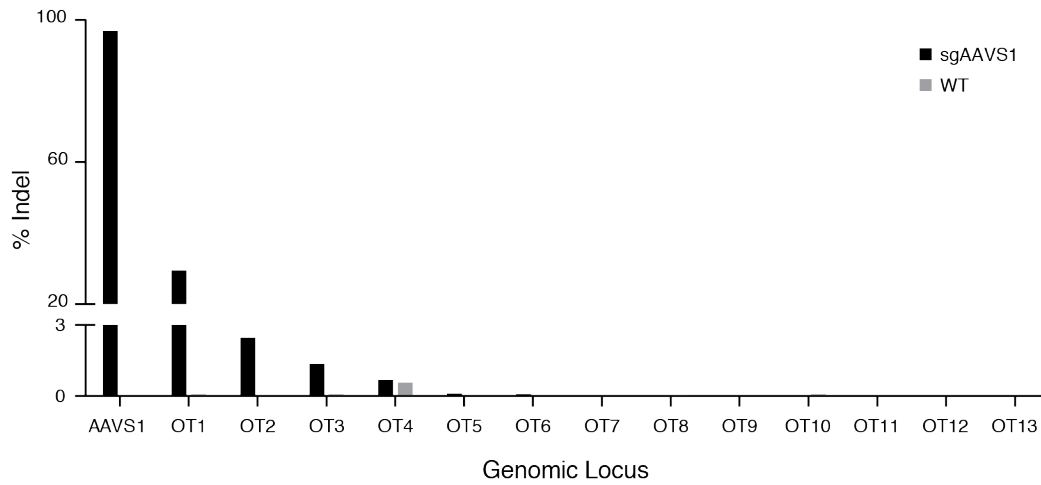

**Fig. S1. Off-target cleavage analysis.**

(A) AAVS1 and predicted sgAAVS1 off-target (OT) sites were individually amplified in a nested PCR from genomic DNA from sgAAVS1-modified and WT Cas9-KBM7 cells and analyzed by high-throughput sequencing. (B) Barplot summary of the results.

**Fig. S2**

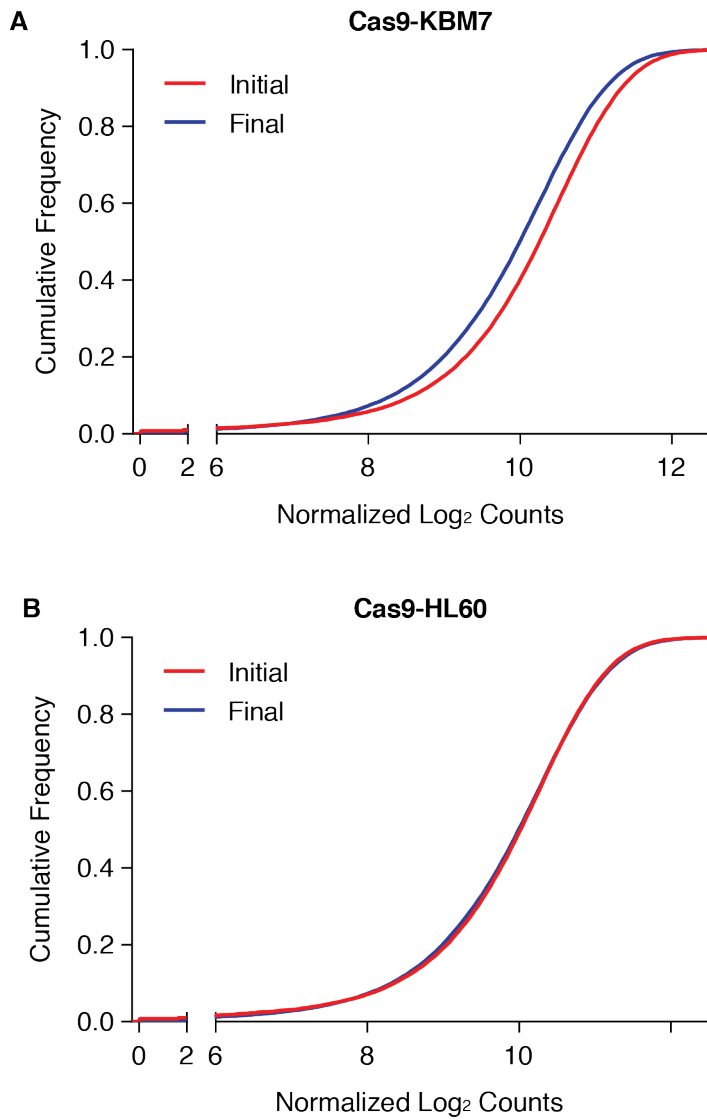

**Fig. S2. Deep sequencing analysis of initial and final sgRNA library representation.**

**(A)** Cumulative distribution function plots of sgRNA barcodes 24 hours after infection and after twelve cell doublings in Cas9-KBM7 and **(B)** Cas9-HL60 cells.

**Fig. S3**

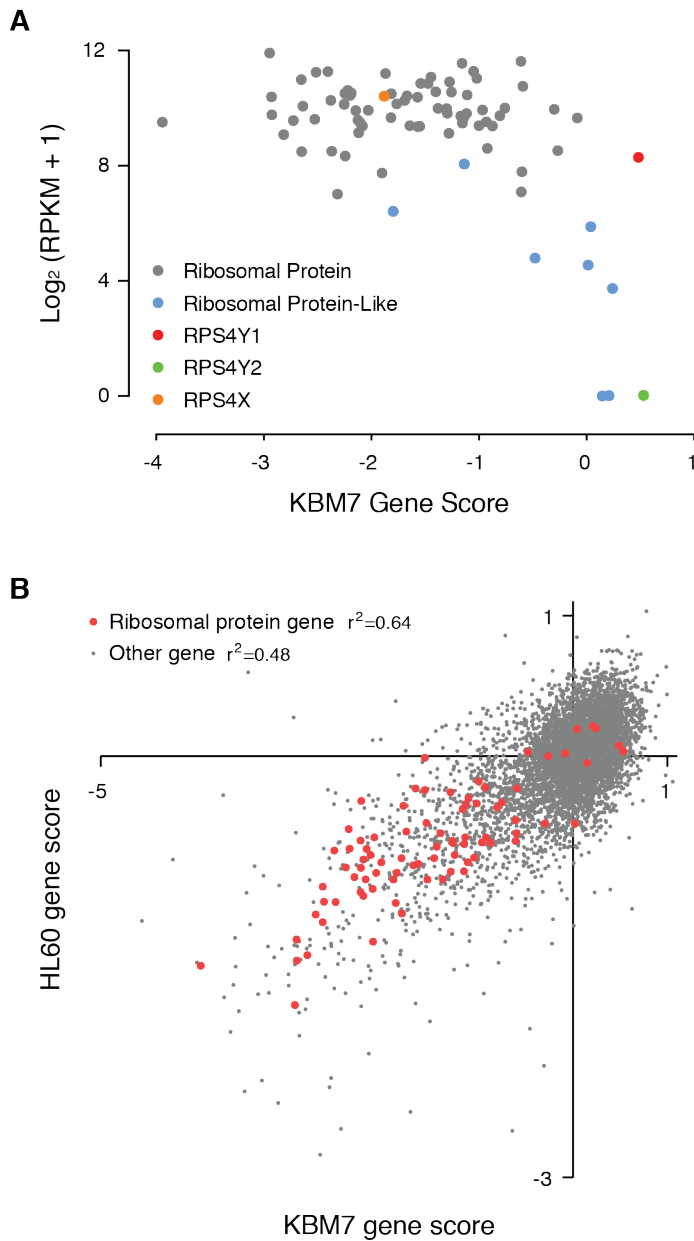

**Fig. S3. Negative selection screens reveal essential genes.**

**(A)** Ribosomal protein gene essentiality correlates with expression. Ribosomal protein gene depletion scores from the negative selection screen in Cas9-KBM7 cells are plotted against transcript abundance as determined by RNA-seq analysis of the KBM7 cell line.

**(B)** Gene depletion scores of all genes screened are well correlated between Cas9-KBM7 and Cas9-HL60 cells.

**Fig. S4**

**A**

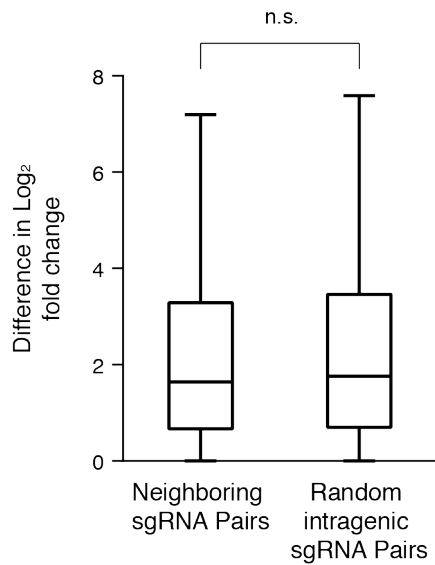

**Fig. S4. High variability is observed between neighboring ribosomal protein gene-targeting sgRNAs.**

**(A)** Differences in  $\log_2$  fold change of neighboring sgRNA pairs are similar to differences in  $\log_2$  fold change of random sgRNA pairs within the same gene indicating that local chromatin state does not significantly impact sgRNA efficacy.

**Fig. S5**

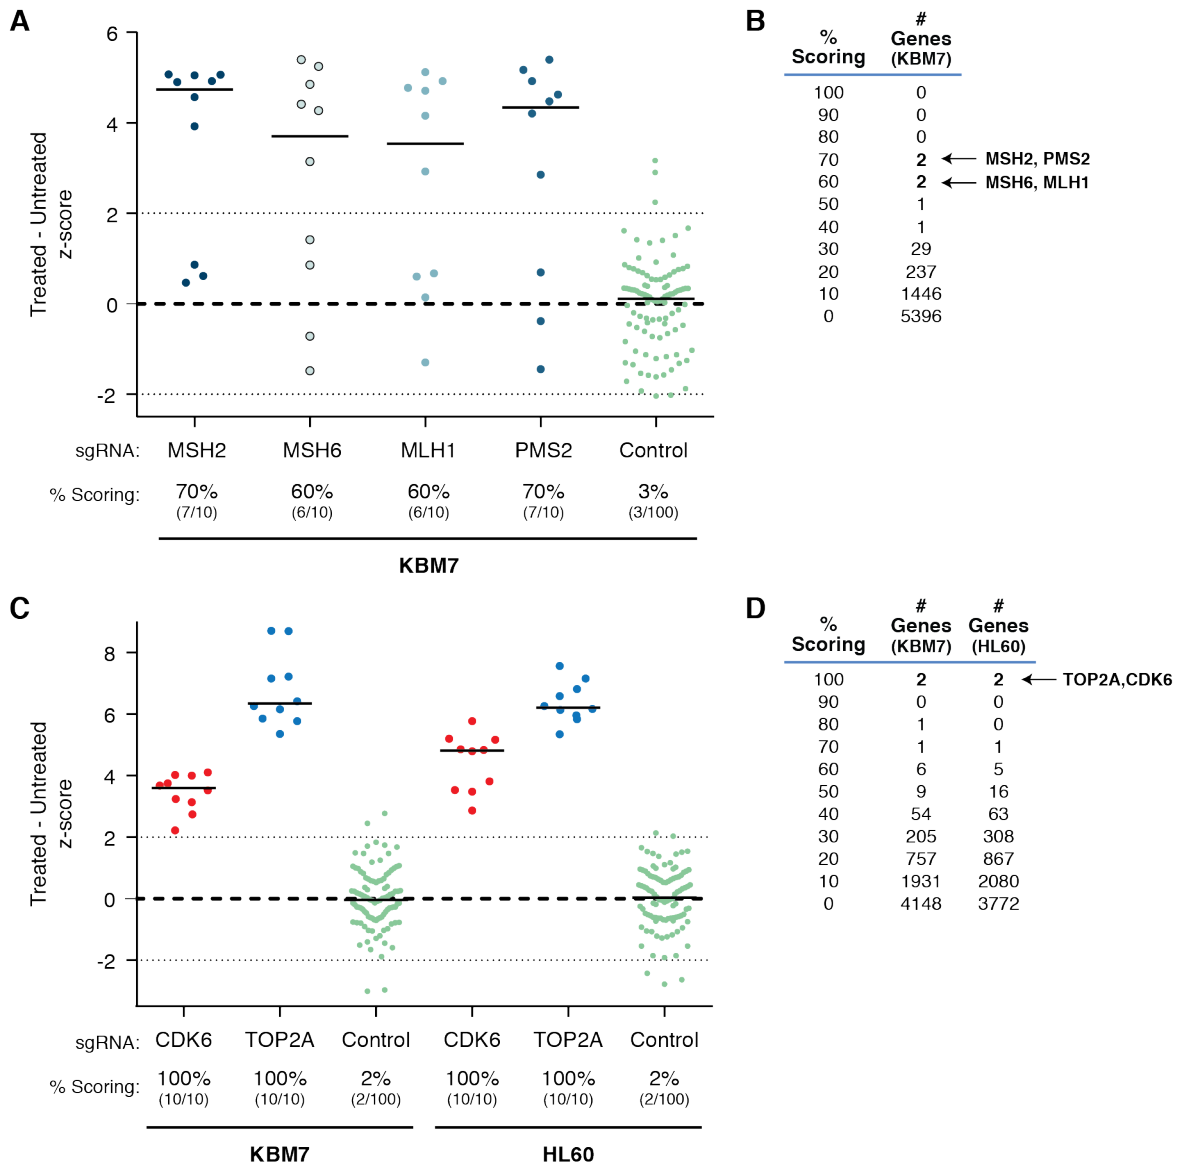

**Fig. S5. z-score analysis of positive selection screens.**

(A) z-scores of all sgRNAs targeting hit genes and non-targeting controls in the 6-TG screen. A sgRNA ‘scores’ if  $z > 2$ . (B) Perfect discrimination between true and false positives is achieved at this significance threshold. (C) z-scores of all sgRNAs targeting hit genes and non-targeting controls in the etoposide screens. A sgRNA ‘scores’ if  $z > 2$ . (D) Perfect discrimination between true and false positives is achieved at this significance threshold.

## **Table Captions**

### **Table S1 (separate file)**

Annotations for the genome-scale sgRNA library containing spacer sequences and target gene information.

### **Table S2 (separate file)**

Gene-level data for etoposide screens in KBM7 and HL60 cells.

### **Table S3 (separate file)**

Annotations for the mini sgRNA library containing spacer sequences and target gene information.

### **Table S4 (separate file)**

Gene-level data for negative selection screens in KBM7 and HL60 cells.

### **Table S8 (separate file)**

Annotations for the predicted genome-wide sgRNA library containing spacer sequences and target gene information.

## Tables

| Rank | Gene     | Name                                                     | Yeast homolog | Essential in yeast? <sup>a</sup> | Evidence in other organisms                                       |
|------|----------|----------------------------------------------------------|---------------|----------------------------------|-------------------------------------------------------------------|
| 1    | SF3B3    | splicing factor 3b, subunit 3, 130kDa                    | RSE1          | Yes                              | teg-4 <sup>b</sup><br>CG13900 <sup>d</sup>                        |
| 2    | RPP21    | ribonuclease P/MRP 21kDa subunit                         | RPR2          | Yes                              |                                                                   |
| 3    | C1orf109 | chromosome 1 open reading frame 109                      | -             | -                                | c1orf109 <sup>f</sup><br>human (35)                               |
| 4    | PCNA     | proliferating cell nuclear antigen                       | POL30         | Yes                              | pcn-1 <sup>b</sup><br>mus209 <sup>e</sup>                         |
| 5    | CDAN1    | codanin 1                                                | -             | -                                | dlt <sup>e</sup><br>mouse (36)                                    |
| 6    | PSMA7    | proteasome (prosome, macropain) subunit, alpha type, 7   | PRE6          | Yes                              | pas-4 <sup>b</sup>                                                |
| 7    | GTF2B    | general transcription factor IIB                         | SUA7          | Yes                              | ttb-1 <sup>b</sup>                                                |
| 8    | ANAPC4   | anaphase promoting complex subunit 4                     | APC4          | Yes                              | emb-30 <sup>c</sup>                                               |
| 9    | CDC16    | cell division cycle 16                                   | CDC16         | Yes                              | emb-27 <sup>b</sup>                                               |
| 10   | TPT1     | tumor protein, translationally-controlled 1              | TMA19         | NO                               | tct-1 <sup>c</sup><br>mouse (37)                                  |
| 11   | SF3A3    | splicing factor 3a, subunit 3, 60kDa                     | PRP9          | Yes                              | T13H5.4 <sup>b</sup><br>noi <sup>e</sup><br>sf3a3 <sup>f</sup>    |
| 12   | PREB     | prolactin regulatory element binding                     | SEC12         | Yes                              | sec-12 <sup>c</sup>                                               |
| 13   | HSPA9    | heat shock 70kDa protein 9 (mortalin)                    | SSC1          | Yes                              | hsp-6 <sup>b</sup><br>Hsc70-5 <sup>e</sup><br>Hspa9b <sup>f</sup> |
| 14   | POLR2A   | polymerase (RNA) II (DNA directed) polypeptide A, 220kDa | RPO21         | Yes                              | ama-1 <sup>b</sup><br>RpII215 <sup>d</sup>                        |
| 15   | PCF11    | PCF11 cleavage and polyadenylation factor subunit        | PCF11         | Yes                              | pcf-11 <sup>b</sup><br>CG10228 <sup>d</sup>                       |
| 16   | POLR2L   | polymerase (RNA) II (DNA directed) polypeptide L, 7.6kDa | RPB10         | Yes                              | rpb-10 <sup>b</sup><br>rpb10 <sup>d</sup>                         |
| 17   | SPC24    | SPC24, NDC80 kinetochore complex component               | SPC24         | Yes                              |                                                                   |

|    |        |                                                        |        |     |                                             |
|----|--------|--------------------------------------------------------|--------|-----|---------------------------------------------|
| 18 | THAP1  | THAP domain containing, apoptosis associated protein 1 | -      | -   | human (38)                                  |
| 19 | CDC123 | cell division cycle 123                                | CDC123 | Yes |                                             |
| 20 | WDR74  | WD repeat domain 74                                    | NSA1   | Yes | T06E6.1 <sup>b</sup><br>CG7845 <sup>d</sup> |

Large-scale studies:

<sup>a</sup>*S. cerevisiae* (1)

<sup>b</sup>*C. elegans* (39)

<sup>c</sup>*C. elegans* (40)

<sup>d</sup>*D. melanogaster* (41)

<sup>e</sup>*D. melanogaster* (42)

<sup>f</sup>*D. rerio* (43)

**Table S5. Independent evidence of essentiality for the top 20 non-ribosomal genes.**

Functional data from large-scale studies in model organisms and single gene studies in mice and human cell lines. 16 of 17 yeast homologs are essential. The sole except *TPT1* is essential in mice and *C. elegans*.



| <b>KEGG DNA REPLICATION</b> |                   |            |            |      |
|-----------------------------|-------------------|------------|------------|------|
| Gene                        | Rank in Gene List | Raw Metric | Running ES | Core |
| RPA4                        | 1045              | 5512       | -0.12      | No   |
| POLD1                       | 3054              | 3944       | -0.378     | No   |
| POLE4                       | 3938              | 3332       | -0.474     | No   |
| MCM3                        | 4717              | 2712.5     | -0.556     | No   |
| RFC1                        | 4959              | 2497.5     | -0.561     | No   |
| LIG1                        | 5098              | 2369       | -0.551     | No   |
| POLD4                       | 5587              | 1839.5     | -0.592     | Yes  |
| POLE3                       | 5640              | 1778       | -0.57      | Yes  |
| RPA2                        | 5668              | 1751.5     | -0.544     | Yes  |
| POLA1                       | 5689              | 1723.5     | -0.518     | Yes  |
| RNASEH2B                    | 6006              | 1322.5     | -0.533     | Yes  |
| POLE                        | 6039              | 1283       | -0.509     | Yes  |
| RPA3                        | 6180              | 1120       | -0.499     | Yes  |
| RNASEH2C                    | 6462              | 720.5      | -0.51      | Yes  |
| DNA2                        | 6496              | 673.5      | -0.485     | Yes  |
| RFC4                        | 6533              | 629.5      | -0.461     | Yes  |
| MCM7                        | 6542              | 615.5      | -0.433     | Yes  |
| MCM2                        | 6557              | 596        | -0.405     | Yes  |
| RNASEH2A                    | 6586              | 565.5      | -0.38      | Yes  |
| RFC2                        | 6668              | 465        | -0.362     | Yes  |
| MCM5                        | 6684              | 428.5      | -0.335     | Yes  |
| MCM4                        | 6724              | 385.5      | -0.311     | Yes  |
| POLD3                       | 6766              | 342        | -0.287     | Yes  |
| POLD2                       | 6806              | 286.5      | -0.264     | Yes  |
| MCM6                        | 6808              | 286        | -0.234     | Yes  |
| PRIM1                       | 6817              | 275        | -0.206     | Yes  |
| PRIM2                       | 6845              | 247.5      | -0.18      | Yes  |
| RFC5                        | 6867              | 218        | -0.154     | Yes  |
| POLE2                       | 6904              | 175.5      | -0.13      | Yes  |
| RFC3                        | 6917              | 153.5      | -0.102     | Yes  |
| RPA1                        | 6944              | 119        | -0.076     | Yes  |
| FEN1                        | 6972              | 72.5       | -0.051     | Yes  |
| POLA2                       | 6979              | 66.5       | -0.022     | Yes  |
| PCNA                        | 7026              | 13         | 1.00E-03   | Yes  |
| <b>KEGG RNA POLYMERASE</b>  |                   |            |            |      |
| Gene                        | Rank in Gene List | Raw Metric | Running ES | Core |

|                         |                   |            |            |      |
|-------------------------|-------------------|------------|------------|------|
| POLR1D                  | 3555              | 3610       | -0.466     | No   |
| POLR2F                  | 3644              | 3534.5     | -0.437     | No   |
| POLR3B                  | 3902              | 3352.5     | -0.432     | No   |
| POLR3GL                 | 4839              | 2604.5     | -0.524     | No   |
| POLR3A                  | 5107              | 2363       | -0.52      | No   |
| POLR3D                  | 5251              | 2215       | -0.499     | No   |
| POLR1A                  | 5985              | 1354.5     | -0.562     | Yes  |
| POLR3F                  | 6247              | 1026.5     | -0.557     | Yes  |
| POLR1C                  | 6313              | 922.5      | -0.525     | Yes  |
| POLR2H                  | 6431              | 771        | -0.5       | Yes  |
| ZNRD1                   | 6694              | 412.5      | -0.496     | Yes  |
| POLR3C                  | 6709              | 398        | -0.456     | Yes  |
| POLR2B                  | 6744              | 368        | -0.419     | Yes  |
| POLR2D                  | 6763              | 348        | -0.38      | Yes  |
| POLR2C                  | 6776              | 335        | -0.34      | Yes  |
| POLR1E                  | 6791              | 312        | -0.3       | Yes  |
| POLR1B                  | 6844              | 249        | -0.266     | Yes  |
| POLR2G                  | 6919              | 152.5      | -0.235     | Yes  |
| POLR3K                  | 6948              | 108        | -0.197     | Yes  |
| POLR3H                  | 6983              | 63.5       | -0.161     | Yes  |
| POLR2E                  | 6998              | 47.5       | -0.121     | Yes  |
| POLR2I                  | 7007              | 37.5       | -0.08      | Yes  |
| POLR2L                  | 7014              | 27.5       | -0.04      | Yes  |
| POLR2A                  | 7018              | 24.5       | 0.002      | Yes  |
| <b>KEGG SPLICEOSOME</b> |                   |            |            |      |
| Gene                    | Rank in Gene List | Raw Metric | Running ES | Core |
| HSPA1L                  | 460               | 6160       | -0.057     | No   |
| PRPF40B                 | 1234              | 5313       | -0.159     | No   |
| TCERG1                  | 1450              | 5129       | -0.18      | No   |
| HSPA6                   | 2452              | 4350.5     | -0.315     | No   |
| SRSF8                   | 2672              | 4196.5     | -0.337     | No   |
| HSPA2                   | 3066              | 3934.5     | -0.384     | No   |
| TRA2A                   | 3276              | 3781.5     | -0.404     | No   |
| SRSF4                   | 3524              | 3624       | -0.43      | No   |
| PQBP1                   | 3603              | 3564       | -0.432     | No   |
| U2SURP                  | 3746              | 3466       | -0.442     | No   |
| PPIL1                   | 4504              | 2883.5     | -0.542     | No   |
| DDX5                    | 4508              | 2881       | -0.533     | No   |
| WBP11                   | 4689              | 2731.5     | -0.549     | No   |

|         |      |        |        |     |
|---------|------|--------|--------|-----|
| SNRPB2  | 4710 | 2718   | -0.542 | No  |
| DHX16   | 4751 | 2683   | -0.538 | No  |
| DDX42   | 4956 | 2499   | -0.558 | No  |
| SNRNP40 | 5269 | 2200   | -0.593 | No  |
| DDX46   | 5457 | 1988.5 | -0.61  | Yes |
| PPIE    | 5472 | 1974.5 | -0.603 | Yes |
| PRPF31  | 5486 | 1958   | -0.595 | Yes |
| SRSF5   | 5499 | 1941.5 | -0.587 | Yes |
| LSM5    | 5615 | 1812   | -0.594 | Yes |
| U2AF1   | 5617 | 1810.5 | -0.584 | Yes |
| HNRNPA1 | 5676 | 1736   | -0.583 | Yes |
| USP39   | 5738 | 1674   | -0.582 | Yes |
| PRPF4   | 5788 | 1616.5 | -0.579 | Yes |
| DHX8    | 5893 | 1466.5 | -0.585 | Yes |
| LSM2    | 5958 | 1387   | -0.584 | Yes |
| AQR     | 5982 | 1355.5 | -0.578 | Yes |
| PLRG1   | 6062 | 1261   | -0.58  | Yes |
| U2AF2   | 6076 | 1250.5 | -0.572 | Yes |
| CCDC12  | 6110 | 1221   | -0.567 | Yes |
| THOC1   | 6112 | 1219   | -0.557 | Yes |
| DDX23   | 6147 | 1159   | -0.552 | Yes |
| CRNKL1  | 6183 | 1116   | -0.548 | Yes |
| LSM4    | 6186 | 1114.5 | -0.538 | Yes |
| ISY1    | 6204 | 1092   | -0.531 | Yes |
| RBMX    | 6210 | 1084.5 | -0.522 | Yes |
| CWC15   | 6252 | 1015   | -0.518 | Yes |
| SRSF9   | 6270 | 984.5  | -0.511 | Yes |
| RBM8A   | 6291 | 956    | -0.504 | Yes |
| SNRNP70 | 6321 | 915.5  | -0.499 | Yes |
| SNRNP27 | 6324 | 912.5  | -0.489 | Yes |
| SRSF10  | 6325 | 912    | -0.48  | Yes |
| SLU7    | 6337 | 894.5  | -0.471 | Yes |
| DHX38   | 6338 | 894    | -0.462 | Yes |
| SF3A1   | 6343 | 889    | -0.453 | Yes |
| XAB2    | 6371 | 856.5  | -0.447 | Yes |
| SNW1    | 6373 | 854    | -0.437 | Yes |
| SNRPD3  | 6395 | 829    | -0.431 | Yes |
| RBM17   | 6402 | 819.5  | -0.422 | Yes |
| CDC40   | 6406 | 814    | -0.412 | Yes |

|         |      |       |        |     |
|---------|------|-------|--------|-----|
| PRPF3   | 6442 | 746.5 | -0.408 | Yes |
| NHP2L1  | 6463 | 718   | -0.401 | Yes |
| THOC2   | 6469 | 709   | -0.392 | Yes |
| RBM25   | 6473 | 707.5 | -0.383 | Yes |
| HNRNPU  | 6478 | 698   | -0.374 | Yes |
| PRPF8   | 6486 | 685.5 | -0.365 | Yes |
| NAA38   | 6492 | 677.5 | -0.356 | Yes |
| SNRPA   | 6495 | 673.5 | -0.346 | Yes |
| SYF2    | 6514 | 654.5 | -0.339 | Yes |
| HNRNPM  | 6518 | 648.5 | -0.33  | Yes |
| BCAS2   | 6534 | 629   | -0.323 | Yes |
| EFTUD2  | 6569 | 578.5 | -0.318 | Yes |
| PRPF18  | 6605 | 544   | -0.313 | Yes |
| SMNDC1  | 6609 | 538.5 | -0.304 | Yes |
| PRPF38A | 6641 | 499   | -0.299 | Yes |
| SF3B5   | 6643 | 494.5 | -0.289 | Yes |
| PRPF38B | 6655 | 480.5 | -0.281 | Yes |
| SNRPB   | 6657 | 479.5 | -0.271 | Yes |
| ACIN1   | 6664 | 468.5 | -0.262 | Yes |
| DHX15   | 6686 | 426.5 | -0.256 | Yes |
| SNRPC   | 6727 | 383   | -0.252 | Yes |
| CTNNBL1 | 6739 | 375   | -0.244 | Yes |
| TRA2B   | 6741 | 373.5 | -0.234 | Yes |
| ZMAT2   | 6742 | 370   | -0.224 | Yes |
| SNRPD2  | 6771 | 339.5 | -0.219 | Yes |
| LSM7    | 6772 | 339.5 | -0.209 | Yes |
| PUF60   | 6783 | 325   | -0.201 | Yes |
| CDC5L   | 6801 | 297   | -0.194 | Yes |
| SART1   | 6805 | 291   | -0.184 | Yes |
| SRSF6   | 6807 | 286   | -0.175 | Yes |
| NCBP1   | 6826 | 264.5 | -0.168 | Yes |
| SNRPA1  | 6827 | 264.5 | -0.158 | Yes |
| SF3B2   | 6831 | 261   | -0.149 | Yes |
| SRSF7   | 6841 | 250.5 | -0.14  | Yes |
| DDX39B  | 6852 | 241   | -0.132 | Yes |
| RBM22   | 6859 | 230.5 | -0.123 | Yes |
| PRPF19  | 6864 | 224.5 | -0.114 | Yes |
| HNRNPK  | 6894 | 189   | -0.108 | Yes |
| SF3A2   | 6912 | 167.5 | -0.101 | Yes |

|                                    |                   |            |            |      |
|------------------------------------|-------------------|------------|------------|------|
| BUD31                              | 6923              | 149.5      | -0.093     | Yes  |
| PRPF6                              | 6927              | 147        | -0.084     | Yes  |
| PCBP1                              | 6928              | 142.5      | -0.074     | Yes  |
| EIF4A3                             | 6939              | 129        | -0.066     | Yes  |
| NCBP2                              | 6942              | 121.5      | -0.056     | Yes  |
| SNRNP200                           | 6951              | 101.5      | -0.048     | Yes  |
| TXNL4A                             | 6963              | 88.5       | -0.04      | Yes  |
| SRSF3                              | 6975              | 69.5       | -0.031     | Yes  |
| SRSF2                              | 6989              | 54.5       | -0.024     | Yes  |
| SRSF1                              | 7002              | 44         | -0.016     | Yes  |
| SF3A3                              | 7020              | 23.5       | -0.008     | Yes  |
| SF3B3                              | 7030              | 8          | 0.00E+00   | Yes  |
| <b>BIOCARTA_PROTEASOME_PATHWAY</b> |                   |            |            |      |
| Gene                               | Rank in Gene List | Raw Metric | Running ES | Core |
| UBE2A                              | 319               | 6328.5     | -0.007     | No   |
| UBE3A                              | 2034              | 4674.5     | -0.213     | No   |
| PSMD8                              | 2876              | 4054.5     | -0.295     | No   |
| PSMA4                              | 5599              | 1831       | -0.645     | Yes  |
| PSMC4                              | 5706              | 1708.5     | -0.622     | Yes  |
| PSMB6                              | 5800              | 1603       | -0.596     | Yes  |
| PSMD12                             | 6056              | 1267       | -0.594     | Yes  |
| PSMA3                              | 6094              | 1233       | -0.561     | Yes  |
| RPN2                               | 6161              | 1148       | -0.532     | Yes  |
| PSMB4                              | 6202              | 1096       | -0.499     | Yes  |
| PSMD14                             | 6366              | 862        | -0.484     | Yes  |
| PSMB3                              | 6394              | 829        | -0.45      | Yes  |
| PSMC2                              | 6438              | 753        | -0.417     | Yes  |
| PSMB1                              | 6516              | 652.5      | -0.39      | Yes  |
| PSMB5                              | 6649              | 487.5      | -0.37      | Yes  |
| PSMA2                              | 6674              | 451.5      | -0.335     | Yes  |
| PSMA1                              | 6716              | 392.5      | -0.303     | Yes  |
| PSMB2                              | 6762              | 348        | -0.271     | Yes  |
| PSMA5                              | 6768              | 341.5      | -0.233     | Yes  |
| PSMD6                              | 6795              | 306.5      | -0.198     | Yes  |
| PSMB7                              | 6813              | 281.5      | -0.162     | Yes  |
| PSMC6                              | 6834              | 258        | -0.126     | Yes  |
| PSMA6                              | 6855              | 238        | -0.091     | Yes  |
| PSMC3                              | 6916              | 155        | -0.061     | Yes  |
| PSMD11                             | 6934              | 133.5      | -0.025     | Yes  |

|       |      |    |          |     |
|-------|------|----|----------|-----|
| PSMA7 | 7027 | 13 | 0.00E+00 | Yes |
|-------|------|----|----------|-----|

**Table S6 Gene Set Enrichment Analysis**

Gene composition and scores of the enriched gene sets highlighted in Fig. 3D.

| <b>Variable</b>                 | <b>Degrees of Freedom</b> | <b>Variance Explained (r<sup>2</sup>)</b> |
|---------------------------------|---------------------------|-------------------------------------------|
| Full Sequence (combined)        | 2460                      | 1                                         |
| First 4 nucleotides (combined)  | 250                       | 0.17                                      |
| Middle 4 nucleotides (combined) | 251                       | 0.133                                     |
| Last 4 nucleotides (combined)   | 251                       | 0.291                                     |
| First 4 nucleotides (additive)  | 12                        | 0.04                                      |
| Middle 4 nucleotides (additive) | 12                        | 0.02                                      |
| Last 4 nucleotides (additive)   | 12                        | 0.129                                     |
| GC Content                      | 14                        | 0.025                                     |
| gRNA Strand                     | 1                         | 0.014                                     |
| Exon Type                       | 2                         | 0.013                                     |

**Table S7 Analysis of features influencing sgRNA efficacy**

Summary of the variance in ribosomal protein-targeting sgRNA log<sub>2</sub> fold changes explained by various features of sgRNAs using a general linear model.

## References and Notes

1. G. Giaever, A. M. Chu, L. Ni, C. Connelly, L. Riles, S. Véronneau, S. Dow, A. Lucau-Danila, K. Anderson, B. André, A. P. Arkin, A. Astromoff, M. El-Bakkoury, R. Bangham, R. Benito, S. Brachat, S. Campanaro, M. Curtiss, K. Davis, A. Deutschbauer, K. D. Entian, P. Flaherty, F. Foury, D. J. Garfinkel, M. Gerstein, D. Gotte, U. Güldener, J. H. Hegemann, S. Hempel, Z. Herman, D. F. Jaramillo, D. E. Kelly, S. L. Kelly, P. Kötter, D. LaBonte, D. C. Lamb, N. Lan, H. Liang, H. Liao, L. Liu, C. Luo, M. Lussier, R. Mao, P. Menard, S. L. Ooi, J. L. Revuelta, C. J. Roberts, M. Rose, P. Ross-Macdonald, B. Scherens, G. Schimmack, B. Shafer, D. D. Shoemaker, S. Sookhai-Mahadeo, R. K. Storms, J. N. Strathern, G. Valle, M. Voet, G. Volckaert, C. Y. Wang, T. R. Ward, J. Wilhelmy, E. A. Winzeler, Y. Yang, G. Yen, E. Youngman, K. Yu, H. Bussey, J. D. Boeke, M. Snyder, P. Philippsen, R. W. Davis, M. Johnston, Functional profiling of the *Saccharomyces cerevisiae* genome. *Nature* **418**, 387–391 (2002). [doi:10.1038/nature00935](https://doi.org/10.1038/nature00935) [Medline](#)
2. M. Costanzo, A. Baryshnikova, J. Bellay, Y. Kim, E. D. Spear, C. S. Sevier, H. Ding, J. L. Koh, K. Toufighi, S. Mostafavi, J. Prinz, R. P. St Onge, B. VanderSluis, T. Makhnevych, F. J. Vizeacoumar, S. Alizadeh, S. Bahr, R. L. Brost, Y. Chen, M. Cokol, R. Deshpande, Z. Li, Z. Y. Lin, W. Liang, M. Marback, J. Paw, B. J. San Luis, E. Shuteriqi, A. H. Tong, N. van Dyk, I. M. Wallace, J. A. Whitney, M. T. Weirauch, G. Zhong, H. Zhu, W. A. Houry, M. Brudno, S. Ragibizadeh, B. Papp, C. Pál, F. P. Roth, G. Giaever, C. Nislow, O. G. Troyanskaya, H. Bussey, G. D. Bader, A. C. Gingras, Q. D. Morris, P. M. Kim, C. A. Kaiser, C. L. Myers, B. J. Andrews, C. Boone, The genetic landscape of a cell. *Science* **327**, 425–431 (2010). [doi:10.1126/science.1180823](https://doi.org/10.1126/science.1180823)
3. J. E. Carette, C. P. Guimaraes, M. Varadarajan, A. S. Park, I. Wuethrich, A. Godarova, M. Kotecki, B. H. Cochran, E. Spooner, H. L. Ploegh, T. R. Brummelkamp, Haploid genetic screens in human cells identify host factors used by pathogens. *Science* **326**, 1231–1235 (2009). [doi:10.1126/science.1178955](https://doi.org/10.1126/science.1178955)
4. G. Guo, W. Wang, A. Bradley, Mismatch repair genes identified using genetic screens in Blm-deficient embryonic stem cells. *Nature* **429**, 891–895 (2004). [doi:10.1038/nature02653](https://doi.org/10.1038/nature02653) [Medline](#)
5. A. Fire, S. Xu, M. K. Montgomery, S. A. Kostas, S. E. Driver, C. C. Mello, Potent and specific genetic interference by double-stranded RNA in *Caenorhabditis elegans*. *Nature* **391**, 806–811 (1998). [doi:10.1038/35888](https://doi.org/10.1038/35888) [Medline](#)
6. T. R. Brummelkamp, R. Bernards, R. Agami, A system for stable expression of short interfering RNAs in mammalian cells. *Science* **296**, 550–553 (2002). [doi:10.1126/science.1068999](https://doi.org/10.1126/science.1068999)
7. J. Moffat, D. A. Grueneberg, X. Yang, S. Y. Kim, A. M. Kloepfer, G. Hinkle, B. Piqani, T. M. Eisenhaure, B. Luo, J. K. Grenier, A. E. Carpenter, S. Y. Foo, S. A. Stewart, B. R. Stockwell, N. Hacohen, W. C. Hahn, E. S. Lander, D. M. Sabatini, D. E. Root, A lentiviral RNAi library for human and mouse genes applied to an arrayed viral high-content screen. *Cell* **124**, 1283–1298 (2006). [doi:10.1016/j.cell.2006.01.040](https://doi.org/10.1016/j.cell.2006.01.040) [Medline](#)



8. V. N. Ngo, R. E. Davis, L. Lamy, X. Yu, H. Zhao, G. Lenz, L. T. Lam, S. Dave, L. Yang, J. Powell, L. M. Staudt, A loss-of-function RNA interference screen for molecular targets in cancer. *Nature* **441**, 106–110 (2006). [doi:10.1038/nature04687](https://doi.org/10.1038/nature04687) [Medline](#)
9. H. W. Cheung, G. S. Cowley, B. A. Weir, J. S. Boehm, S. Rusin, J. A. Scott, A. East, L. D. Ali, P. H. Lizotte, T. C. Wong, G. Jiang, J. Hsiao, C. H. Mermel, G. Getz, J. Barretina, S. Gopal, P. Tamayo, J. Gould, A. Tsherniak, N. Stransky, B. Luo, Y. Ren, R. Drapkin, S. N. Bhatia, J. P. Mesirov, L. A. Garraway, M. Meyerson, E. S. Lander, D. E. Root, W. C. Hahn, Systematic investigation of genetic vulnerabilities across cancer cell lines reveals lineage-specific dependencies in ovarian cancer. *Proc. Natl. Acad. Sci. U.S.A.* **108**, 12372–12377 (2011). [doi:10.1073/pnas.1109363108](https://doi.org/10.1073/pnas.1109363108) [Medline](#)
10. C. J. Echeverri, P. A. Beachy, B. Baum, M. Boutros, F. Buchholz, S. K. Chanda, J. Downward, J. Ellenberg, A. G. Fraser, N. Hacohen, W. C. Hahn, A. L. Jackson, A. Kiger, P. S. Linsley, L. Lum, Y. Ma, B. Mathey-Prévôt, D. E. Root, D. M. Sabatini, J. Taipale, N. Perrimon, R. Bernards, Minimizing the risk of reporting false positives in large-scale RNAi screens. *Nat. Methods* **3**, 777–779 (2006). [doi:10.1038/nmeth1006-777](https://doi.org/10.1038/nmeth1006-777) [Medline](#)
11. M. Booker, A. A. Samsonova, Y. Kwon, I. Flockhart, S. E. Mohr, N. Perrimon, False negative rates in Drosophila cell-based RNAi screens: A case study. *BMC Genomics* **12**, 50 (2011). [doi:10.1186/1471-2164-12-50](https://doi.org/10.1186/1471-2164-12-50) [Medline](#)
12. W. G. Kaelin Jr., Use and abuse of RNAi to study mammalian gene function. *Science* **337**, 421–422 (2012). [doi:10.1126/science.1225787](https://doi.org/10.1126/science.1225787)
13. R. Barrangou, C. Fremaux, H. Deveau, M. Richards, P. Boyaval, S. Moineau, D. A. Romero, P. Horvath, CRISPR provides acquired resistance against viruses in prokaryotes. *Science* **315**, 1709–1712 (2007). [doi:10.1126/science.1138140](https://doi.org/10.1126/science.1138140)
14. L. Cong, F. A. Ran, D. Cox, S. Lin, R. Barretto, N. Habib, P. D. Hsu, X. Wu, W. Jiang, L. A. Marraffini, F. Zhang, Multiplex genome engineering using CRISPR/Cas systems. *Science* **339**, 819–823 (2013). [doi:10.1126/science.1231143](https://doi.org/10.1126/science.1231143)
15. P. Mali, L. Yang, K. M. Esvelt, J. Aach, M. Guell, J. E. DiCarlo, J. E. Norville, G. M. Church, RNA-guided human genome engineering via Cas9. *Science* **339**, 823–826 (2013). [doi:10.1126/science.1232033](https://doi.org/10.1126/science.1232033)
16. W. Y. Hwang, Y. Fu, D. Reyon, M. L. Maeder, S. Q. Tsai, J. D. Sander, R. T. Peterson, J. R. Yeh, J. K. Joung, Efficient genome editing in zebrafish using a CRISPR-Cas system. *Nat. Biotechnol.* **31**, 227–229 (2013). [doi:10.1038/nbt.2501](https://doi.org/10.1038/nbt.2501) [Medline](#)
17. M. Jinek, K. Chylinski, I. Fonfara, M. Hauer, J. A. Doudna, E. Charpentier, A programmable dual-RNA-guided DNA endonuclease in adaptive bacterial immunity. *Science* **337**, 816–821 (2012). [doi:10.1126/science.1225829](https://doi.org/10.1126/science.1225829)
18. T. Horii, D. Tamura, S. Morita, M. Kimura, I. Hatada, Generation of an ICF syndrome model by efficient genome editing of human induced pluripotent stem cells using the CRISPR system. *Int. J. Mol. Sci.* **14**, 19774–19781 (2013). [doi:10.3390/ijms141019774](https://doi.org/10.3390/ijms141019774) [Medline](#)
19. H. Wang, H. Yang, C. S. Shivalila, M. M. Dawlaty, A. W. Cheng, F. Zhang, R. Jaenisch, One-step generation of mice carrying mutations in multiple genes by CRISPR/Cas-mediated genome engineering. *Cell* **153**, 910–918 (2013). [doi:10.1016/j.cell.2013.04.025](https://doi.org/10.1016/j.cell.2013.04.025) [Medline](#)

20. P. D. Hsu, D. A. Scott, J. A. Weinstein, F. A. Ran, S. Konermann, V. Agarwala, Y. Li, E. J. Fine, X. Wu, O. Shalem, T. J. Cradick, L. A. Marraffini, G. Bao, F. Zhang, DNA targeting specificity of RNA-guided Cas9 nucleases. *Nat. Biotechnol.* **31**, 827–832 (2013). [doi:10.1038/nbt.2647](https://doi.org/10.1038/nbt.2647) [Medline](#)
21. Y. Fu, J. A. Foden, C. Khayter, M. L. Maeder, D. Reyon, J. K. Joung, J. D. Sander, High-frequency off-target mutagenesis induced by CRISPR-Cas nucleases in human cells. *Nat. Biotechnol.* **31**, 822–826 (2013). [doi:10.1038/nbt.2623](https://doi.org/10.1038/nbt.2623) [Medline](#)
22. V. Pattanayak, S. Lin, J. P. Guilinger, E. Ma, J. A. Doudna, D. R. Liu, High-throughput profiling of off-target DNA cleavage reveals RNA-programmed Cas9 nuclease specificity. *Nat. Biotechnol.* **31**, 839–843 (2013). [doi:10.1038/nbt.2673](https://doi.org/10.1038/nbt.2673) [Medline](#)
23. T. Yan, S. E. Berry, A. B. Desai, T. J. Kinsella, DNA mismatch repair (MMR) mediates 6-thioguanine genotoxicity by introducing single-strand breaks to signal a G2-M arrest in MMR-proficient RKO cells. *Clin. Cancer Res.* **9**, 2327–2334 (2003). [Medline](#)
24. R. D. Kolodner, G. T. Marsischky, Eukaryotic DNA mismatch repair. *Curr. Opin. Genet. Dev.* **9**, 89–96 (1999). [doi:10.1016/S0959-437X\(99\)80013-6](https://doi.org/10.1016/S0959-437X(99)80013-6) [Medline](#)
25. D. J. Burgess, J. Doles, L. Zender, W. Xue, B. Ma, W. R. McCombie, G. J. Hannon, S. W. Lowe, M. T. Hemann, Topoisomerase levels determine chemotherapy response in vitro and in vivo. *Proc. Natl. Acad. Sci. U.S.A.* **105**, 9053–9058 (2008). [doi:10.1073/pnas.0803513105](https://doi.org/10.1073/pnas.0803513105) [Medline](#)
26. B. Scappini, S. Gatto, F. Onida, C. Ricci, V. Divoky, W. G. Wierda, M. Andreeff, L. Dong, K. Hayes, S. Verstovsek, H. M. Kantarjian, M. Beran, Changes associated with the development of resistance to imatinib (STI571) in two leukemia cell lines expressing p210 Bcr/Abl protein. *Cancer* **100**, 1459–1471 (2004). [doi:10.1002/cncr.20131](https://doi.org/10.1002/cncr.20131) [Medline](#)
27. S. Xue, M. Barna, Specialized ribosomes: A new frontier in gene regulation and organismal biology. *Nat. Rev. Mol. Cell Biol.* **13**, 355–369 (2012). [doi:10.1038/nrm3359](https://doi.org/10.1038/nrm3359) [Medline](#)
28. C. M. Johnston, F. L. Lovell, D. A. Leongamornlert, B. E. Stranger, E. T. Dermitzakis, M. T. Ross, Large-scale population study of human cell lines indicates that dosage compensation is virtually complete. *PLOS Genet.* **4**, e9 (2008). [doi:10.1371/journal.pgen.0040009](https://doi.org/10.1371/journal.pgen.0040009) [Medline](#)
29. A. Subramanian, P. Tamayo, V. K. Mootha, S. Mukherjee, B. L. Ebert, M. A. Gillette, A. Paulovich, S. L. Pomeroy, T. R. Golub, E. S. Lander, J. P. Mesirov, Gene set enrichment analysis: a knowledge-based approach for interpreting genome-wide expression profiles. *Proc. Natl. Acad. Sci. U.S.A.* **102**, 15545–15550 (2005). [doi:10.1073/pnas.0506580102](https://doi.org/10.1073/pnas.0506580102) [Medline](#)
30. F. A. Ran, P. D. Hsu, C. Y. Lin, J. S. Gootenberg, S. Konermann, A. E. Trevino, D. A. Scott, A. Inoue, S. Matoba, Y. Zhang, F. Zhang, Double nicking by RNA-guided CRISPR Cas9 for enhanced genome editing specificity. *Cell* **154**, 1380–1389 (2013). [doi:10.1016/j.cell.2013.08.021](https://doi.org/10.1016/j.cell.2013.08.021) [Medline](#)
31. P. Mali, J. Aach, P. B. Stranges, K. M. Esvelt, M. Moosburner, S. Kosuri, L. Yang, G. M. Church, CAS9 transcriptional activators for target specificity screening and paired nickases for cooperative genome engineering. *Nat. Biotechnol.* **31**, 833–838 (2013). [doi:10.1038/nbt.2675](https://doi.org/10.1038/nbt.2675) [Medline](#)

32. K. Yoshimoto, M. Mizoguchi, N. Hata, H. Murata, R. Hatae, T. Amano, A. Nakamizo, T. Sasaki, Complex DNA repair pathways as possible therapeutic targets to overcome temozolomide resistance in glioblastoma. *Front. Oncol.* **2**, 186 (2012). [doi:10.3389/fonc.2012.00186](https://doi.org/10.3389/fonc.2012.00186) [Medline](#)
33. B. Langmead, S. L. Salzberg, Fast gapped-read alignment with Bowtie 2. *Nat. Methods* **9**, 357–359 (2012). [doi:10.1038/nmeth.1923](https://doi.org/10.1038/nmeth.1923) [Medline](#)
34. J. M. Engreitz, A. Pandya-Jones, P. McDonel, A. Shishkin, K. Sirokman, C. Surka, S. Kadri, J. Xing, A. Goren, E. S. Lander, K. Plath, M. Guttman, The Xist lncRNA exploits three-dimensional genome architecture to spread across the X chromosome. *Science* **341**, 1237973 (2013). [doi:10.1126/science.1237973](https://doi.org/10.1126/science.1237973)
35. S. S. Liu, H. X. Zheng, H. D. Jiang, J. He, Y. Yu, Y. P. Qu, L. Yue, Y. Zhang, Y. Li, Identification and characterization of a novel gene, c1orf109, encoding a CK2 substrate that is involved in cancer cell proliferation. *J. Biomed. Sci.* **19**, 49 (2012). [doi:10.1186/1423-0127-19-49](https://doi.org/10.1186/1423-0127-19-49) [Medline](#)
36. R. Renella, N. A. Roberts, J. M. Brown, M. De Gobbi, L. E. Bird, T. Hassanali, J. A. Sharpe, J. Sloane-Stanley, D. J. Ferguson, J. Cordell, V. J. Buckle, D. R. Higgs, W. G. Wood, Codanin-1 mutations in congenital dyserythropoietic anemia type 1 affect HP1 $\alpha$  localization in erythroblasts. *Blood* **117**, 6928–6938 (2011). [doi:10.1182/blood-2010-09-308478](https://doi.org/10.1182/blood-2010-09-308478) [Medline](#)
37. S. H. Chen, P. S. Wu, C. H. Chou, Y. T. Yan, H. Liu, S. Y. Weng, H. F. Yang-Yen, A knockout mouse approach reveals that TCTP functions as an essential factor for cell proliferation and survival in a tissue- or cell type-specific manner. *Mol. Biol. Cell* **18**, 2525–2532 (2007). [doi:10.1091/mbc.E07-02-0188](https://doi.org/10.1091/mbc.E07-02-0188) [Medline](#)
38. C. Cayrol, C. Lacroix, C. Mathe, V. Ecochard, M. Ceribelli, E. Loreau, V. Lazar, P. Dessen, R. Mantovani, L. Aguilar, J. P. Girard, The THAP-zinc finger protein THAP1 regulates endothelial cell proliferation through modulation of pRB/E2F cell-cycle target genes. *Blood* **109**, 584–594 (2007). [doi:10.1182/blood-2006-03-012013](https://doi.org/10.1182/blood-2006-03-012013) [Medline](#)
39. B. Sönnichsen, L. B. Koski, A. Walsh, P. Marschall, B. Neumann, M. Brehm, A. M. Alleaume, J. Artelt, P. Bettencourt, E. Cassin, M. Hewitson, C. Holz, M. Khan, S. Lazik, C. Martin, B. Nitzsche, M. Ruer, J. Stamford, M. Winzi, R. Heinkel, M. Röder, J. Finell, H. Häntsch, S. J. Jones, M. Jones, F. Piano, K. C. Gunsalus, K. Oegema, P. Gönczy, A. Coulson, A. A. Hyman, C. J. Echeverri, Full-genome RNAi profiling of early embryogenesis in *Caenorhabditis elegans*. *Nature* **434**, 462–469 (2005). [doi:10.1038/nature03353](https://doi.org/10.1038/nature03353) [Medline](#)
40. J.-F. Rual, J. Ceron, J. Koreth, T. Hao, A. S. Nicot, T. Hirozane-Kishikawa, J. Vandenhaute, S. H. Orkin, D. E. Hill, S. van den Heuvel, M. Vidal, Toward improving *Caenorhabditis elegans* phenome mapping with an ORFeome-based RNAi library. *Genome Res.* **14**, (10B), 2162–2168 (2004). [doi:10.1101/gr.2505604](https://doi.org/10.1101/gr.2505604) [Medline](#)
41. J. L. Mummery-Widmer, M. Yamazaki, T. Stoeger, M. Novatchkova, S. Bhalerao, D. Chen, G. Dietzl, B. J. Dickson, J. A. Knoblich, Genome-wide analysis of Notch signalling in *Drosophila* by transgenic RNAi. *Nature* **458**, 987–992 (2009). [doi:10.1038/nature07936](https://doi.org/10.1038/nature07936) [Medline](#)

42. A. C. Spradling, D. Stern, A. Beaton, E. J. Rhem, T. Lavery, N. Mozden, S. Misra, G. M. Rubin, The Berkeley Drosophila Genome Project gene disruption project: Single P-element insertions mutating 25% of vital *Drosophila* genes. *Genetics* **153**, 135–177 (1999). [Medline](#)
43. A. Amsterdam, R. M. Nissen, Z. Sun, E. C. Swindell, S. Farrington, N. Hopkins, Identification of 315 genes essential for early zebrafish development. *Proc. Natl. Acad. Sci. U.S.A.* **101**, 12792–12797 (2004). [doi:10.1073/pnas.0403929101](https://doi.org/10.1073/pnas.0403929101) [Medline](#)
